# Supplementary material for: Dalbavancin for the Treatment of Osteomyelitis in Adult Patients: A Randomized Clinical Trial of Efficacy and Safety
Source: PubMed Central journal article supplement (PMC6326511; doi:10.1093/ofid/ofy331), 2018-12-10

Supplementary Material

Supplementary Figure 1. Study design. EOT=end of treatment; IV=intravenous.

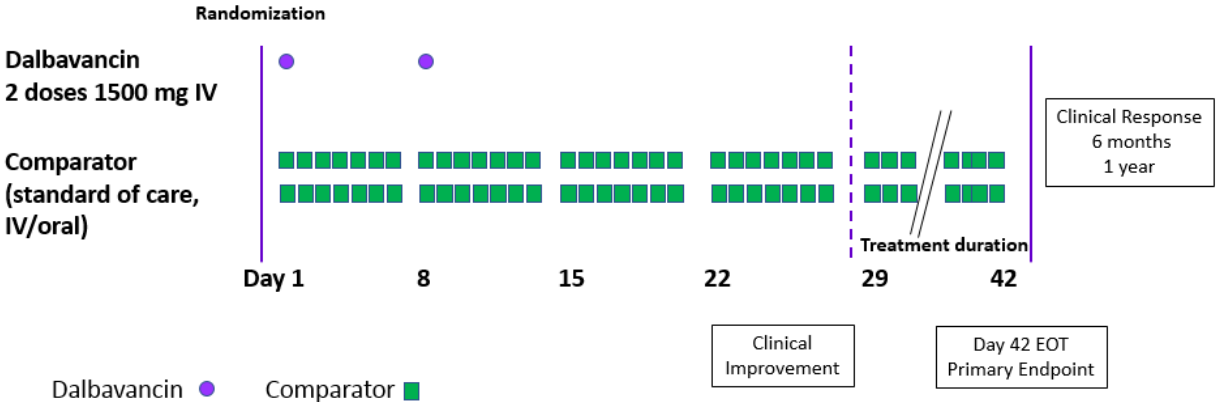

**Supplementary Table 1. All Treatment Regimens for Patients Receiving Standard of Care (Safety Population)**

| <b>Regimen</b>                                                                                | <b>SOC,<br/>no./No.<br/>(%)</b> | <b>Baseline Pathogen(s) in Bone</b>                                                                                                          |
|-----------------------------------------------------------------------------------------------|---------------------------------|----------------------------------------------------------------------------------------------------------------------------------------------|
| Vancomycin IV x 29–30 d (D1–29<br>or D1–30)                                                   | 3/10 (30)                       | <i>Corynebacterium striatum</i> (n=1);<br><i>Staphylococcus epidermidis</i> (n=1);<br>MSSA + <i>Enterococcus faecalis</i> (n=1) <sup>a</sup> |
| Vancomycin IV x 5 d (D1–5);<br>linezolid IV x 25 d (D5–29)                                    | 1/10 (10)                       | MSSA + <i>Staphylococcus epidermidis</i> +<br><i>Streptococcus agalactiae</i>                                                                |
| Vancomycin IV x 6 d (D1–6);<br>linezolid IV x 24 d (D6–29) <sup>b</sup>                       | 1/10 (10)                       | MRSA + <i>Klebsiella pneumoniae</i> + <i>Proteus<br/>mirabilis</i>                                                                           |
| Vancomycin IV x 8 d (D1–8);<br>levofloxacin IV x 22 d (D8–29)                                 | 1/10 (10)                       | MSSA                                                                                                                                         |
| Vancomycin IV x 16 d (D1–16);<br>levofloxacin IV x 15 d (D15–29)                              | 1/10 (10)                       | MSSA                                                                                                                                         |
| Vancomycin IV x 7 d (D1–7);<br>linezolid IV plus cefotaxime IV<br>x 43 d (D7–49) <sup>c</sup> | 1/10 (10)                       | MSSA + <i>Pseudomonas aeruginosa</i> +<br><i>Raoultella planticola</i> + <i>Serratia marcescens</i>                                          |
| <b>Excluded from mITT population<br/>due to only Gram-negative<br/>pathogens in bone</b>      |                                 |                                                                                                                                              |
| Vancomycin IV x 16 d (D1–16);<br>amikacin IV x 13 d (D8–20) <sup>d,e</sup>                    | 1/10 (10)                       | <i>Klebsiella pneumoniae</i> + <i>Proteus mirabilis</i>                                                                                      |

Vancomycin IV x 5 d (D1–5); IV 1/10 (10) *Enterobacter cloacae complex* +  
ceftriaxone x 25 d (D4–29)<sup>d</sup> *Escherichia coli* + *Klebsiella oxytoca*

---

IV=intravenous; all regimens were q12h. d=days; D=Study Day. MRSA=methicillin-resistant *Staphylococcus aureus*; MSSA=methicillin-susceptible *S. aureus*; SOC=standard of care; mITT=modified intent-to-treat

<sup>a</sup>Indeterminate at 6 months and 1 year due to loss to followup. <sup>b</sup>Received adjunctive aztreonam.

<sup>c</sup>Clinical failure at day 42 due to receipt of antibiotics > 6 weeks. <sup>d</sup>Discontinued study drug per protocol when baseline bone culture results showed only gram-negative pathogens; given appropriate gram-negative antibiotic. <sup>e</sup>Withdrew from study on day 20 (withdrew consent)

**Supplementary Table 2. Clinical Cure at Day 42 by Baseline Pathogen (CE Population)**

| <b>Pathogen, n/N (%)<sup>a</sup></b> | <b>Dalbavancin</b>        | <b>Standard of Care</b> |
|--------------------------------------|---------------------------|-------------------------|
| <b>Gram-positive aerobes</b>         |                           |                         |
| <i>Staphylococcus aureus</i>         | 41/42 (97.6) <sup>b</sup> | 5/6 (83.3) <sup>c</sup> |
| MRSA                                 | 4/4 (100)                 | 1/1 (100)               |
| MSSA                                 | 37/38 (97.4) <sup>b</sup> | 4/5 (80.0) <sup>c</sup> |
| Coagulase-negative staphylococci     | 12/14 (85.7) <sup>d</sup> | 2/2 (100) <sup>e</sup>  |
| <i>Enterococcus faecalis</i>         | 7/7 (100)                 | 1/1 (100)               |
| <i>Enterococcus faecium</i>          | 1/1 (100)                 | 0                       |
| <i>Streptococcus agalactiae</i>      | 1/1 (100)                 | 1/1 (100)               |
| <i>Streptococcus dysgalactiae</i>    | 1/1 (100)                 | 0                       |
| <i>Streptococcus pyogenes</i>        | 1/1 (100)                 | 0                       |
| <i>Corynebacterium striatum</i>      | 2/2 (100)                 | 1/1 (100)               |
| <i>Aerococcus viridans</i>           | 1/1 (100)                 | 0                       |
| <i>Globicatella</i> spp              | 1/1 (100)                 | 0                       |
| <i>Micrococcus luteus</i>            | 1/1 (100)                 | 0                       |
| <b>Gram-positive anaerobes</b>       |                           |                         |
| <i>Peptoniphilus harei</i>           | 2/2 (100)                 | 0                       |
| <i>Anaerococcus prevotii</i>         | 1/1 (100)                 | 0                       |
| <i>Fingoldia magna</i>               | 1/1 (100)                 | 0                       |
| <i>Peptostreptococcus anaerobius</i> | 1/1 (100)                 | 0                       |
| <b>Gram-negative aerobes</b>         |                           |                         |
| <i>Escherichia coli</i>              | 3/3 (100)                 | 0                       |

|                                     |           |                      |
|-------------------------------------|-----------|----------------------|
| <i>Klebsiella pneumoniae</i>        | 2/2 (100) | 1/1 (100)            |
| <i>Enterobacter cloacae complex</i> | 2/2 (100) | 0                    |
| <i>Morganella morganii</i>          | 2/2 (100) | 0                    |
| <i>Pseudomonas aeruginosa</i>       | 2/2 (100) | 0/1 (0) <sup>c</sup> |
| <i>Proteus mirabilis</i>            | 1/1 (100) | 1/1 (100)            |
| <i>Raoultella planticola</i>        | 1/1 (100) | 0/1 (0) <sup>c</sup> |
| <i>Acinetobacter calcoaceticus</i>  | 1/1 (100) | 0                    |
| <i>Escherichia hermannii</i>        | 1/1 (100) | 0                    |
| <i>Pluralibacter gergoviae</i>      | 1/1 (100) | 0                    |
| <i>Serratia marcescens</i>          | 0         | 0/1 (0) <sup>c</sup> |

**Gram-negative anaerobes**

|                                      |           |   |
|--------------------------------------|-----------|---|
| <i>Bacteroides fragilis</i>          | 2/2 (100) | 0 |
| <i>Bacteroides thetaiotaomicron</i>  | 1/1 (100) | 0 |
| <i>Bacteroides vulgatus</i>          | 1/1 (100) | 0 |
| <i>Porphyromonas asaccharolytica</i> | 2/2 (100) | 0 |
| <i>Prevotella melaninogenica</i>     | 2/2 (100) | 0 |
| <i>Prevotella disiens</i>            | 1/1 (100) | 0 |
| <i>Prevotella intermedia</i>         | 1/1 (100) | 0 |
| <i>Prevotella spp</i>                | 1/1 (100) | 0 |

---

CE=clinically evaluable; MRSA=methicillin-resistant *Staphylococcus aureus*; MSSA=methicillin-susceptible *Staphylococcus aureus*; SOC=standard of care.

<sup>a</sup>Categories are not mutually exclusive.

<sup>b</sup>One patient was indeterminate due to loss to followup after day 8 visit.

<sup>c</sup>One patient was a failure due to requirement of > 6 weeks of SOC antibiotics.

<sup>d</sup>Two patients were indeterminate due to loss to followup after day 8 visit. Coagulase-negative staphylococci [n/N (%)]: *S. epidermidis*, 6/6 (100); *S. haemolyticus*, 3/4 (75); *S. hominis*, 1/2 (50); *S. pasteurii*, 1/1 (100); *S. simulans*, 1/1 (100).

<sup>e</sup>Coagulase-negative staphylococci [n/N (%)]: *S. epidermidis*, 2/2 (100).

**Supplementary Table 3. Baseline Pathogens in Patients with Mixed Infection, with Gram-Positive and Gram-Negative Aerobic Organism in Bone (Safety Population)**

| Baseline Pathogen, by Patient                                                                                                                                              | Site of Osteomyelitis | Clinical Response at Day 42 |
|----------------------------------------------------------------------------------------------------------------------------------------------------------------------------|-----------------------|-----------------------------|
| <b>Dalbavancin Group</b>                                                                                                                                                   |                       |                             |
| 1. MSSA, <i>Escherichia coli</i> (plus anaerobes <i>Bacteroides fragilis</i> , <i>Peptoniphilus harei</i> )                                                                | Hand                  | Cure                        |
| 2. <i>Enterococcus faecalis</i> , <i>Enterobacter cloacae</i> complex (plus anaerobe <i>Prevotella intermedia</i> )                                                        | Tibia                 | Cure                        |
| 3. MSSA, <i>Enterococcus faecalis</i> , <i>Escherichia coli</i> , <i>Klebsiella pneumoniae</i> (plus anaerobes <i>Bacteroides fragilis</i> , <i>Bacteroides vulgatus</i> ) | Diabetic foot         | Cure                        |
| 4. <i>Staphylococcus haemolyticus</i> , <i>Streptococcus dysgalactiae</i> , <i>Escherichia coli</i> , <i>Klebsiella pneumoniae</i>                                         | Foot (not diabetic)   | Cure                        |
| 5. MSSA, <i>Morganella morganii</i> , <i>Proteus mirabilis</i> (plus anaerobes <i>Bacteroides thetaiotaomicron</i> , <i>Porphyromonas asaccharolytica</i> )                | Foot (not diabetic)   | Cure                        |
| 6. MSSA, <i>Morganella morganii</i> (plus anaerobe <i>Fingoldia magna</i> )                                                                                                | Foot (not diabetic)   | Cure                        |
| 7. <i>Staphylococcus epidermidis</i> , <i>Enterococcus faecalis</i> , <i>Escherichia hermannii</i> , <i>Pluralibacter gergoviae</i> , <i>Raoultella planticola</i>         | Diabetic Foot         | Cure                        |

|                                                                                                                        |                     |      |
|------------------------------------------------------------------------------------------------------------------------|---------------------|------|
| 8. MSSA, <i>Staphylococcus haemolyticus</i> ,<br><i>Acinetobacter calcoaceticus</i>                                    | Patella             | Cure |
| 9. <i>Staphylococcus simulans</i> , <i>Pseudomonas aeruginosa</i>                                                      | Tibia               | Cure |
| 10. MSSA, <i>Pseudomonas aeruginosa</i>                                                                                | Femur               | Cure |
| 11. MSSA, <i>Enterobacter cloacae</i> complex (plus anaerobes <i>Peptoniphilus harei</i> , <i>Prevotella disiens</i> ) | Foot (not diabetic) | Cure |

**SOC Group**

- |                                                                                                    |       |         |
|----------------------------------------------------------------------------------------------------|-------|---------|
| 1. MSSA, <i>Pseudomonas aeruginosa</i> , <i>Raoultella planticola</i> , <i>Serratia marcescens</i> | Tibia | Failure |
| 2. MRSA, <i>Klebsiella pneumoniae</i> , <i>Proteus mirabilis</i>                                   | Femur | Cure    |

MRSA=methicillin-resistant *Staphylococcus aureus*; MSSA= methicillin-susceptible

*Staphylococcus aureus*; SOC=standard of care.



**Supplementary Figure 2.** CRP levels in the mITT population in the A) dalbavancin group and B) SOC group. CRP=C-reactive protein; mITT=modified intent-to-treat; SOC=standard of care.

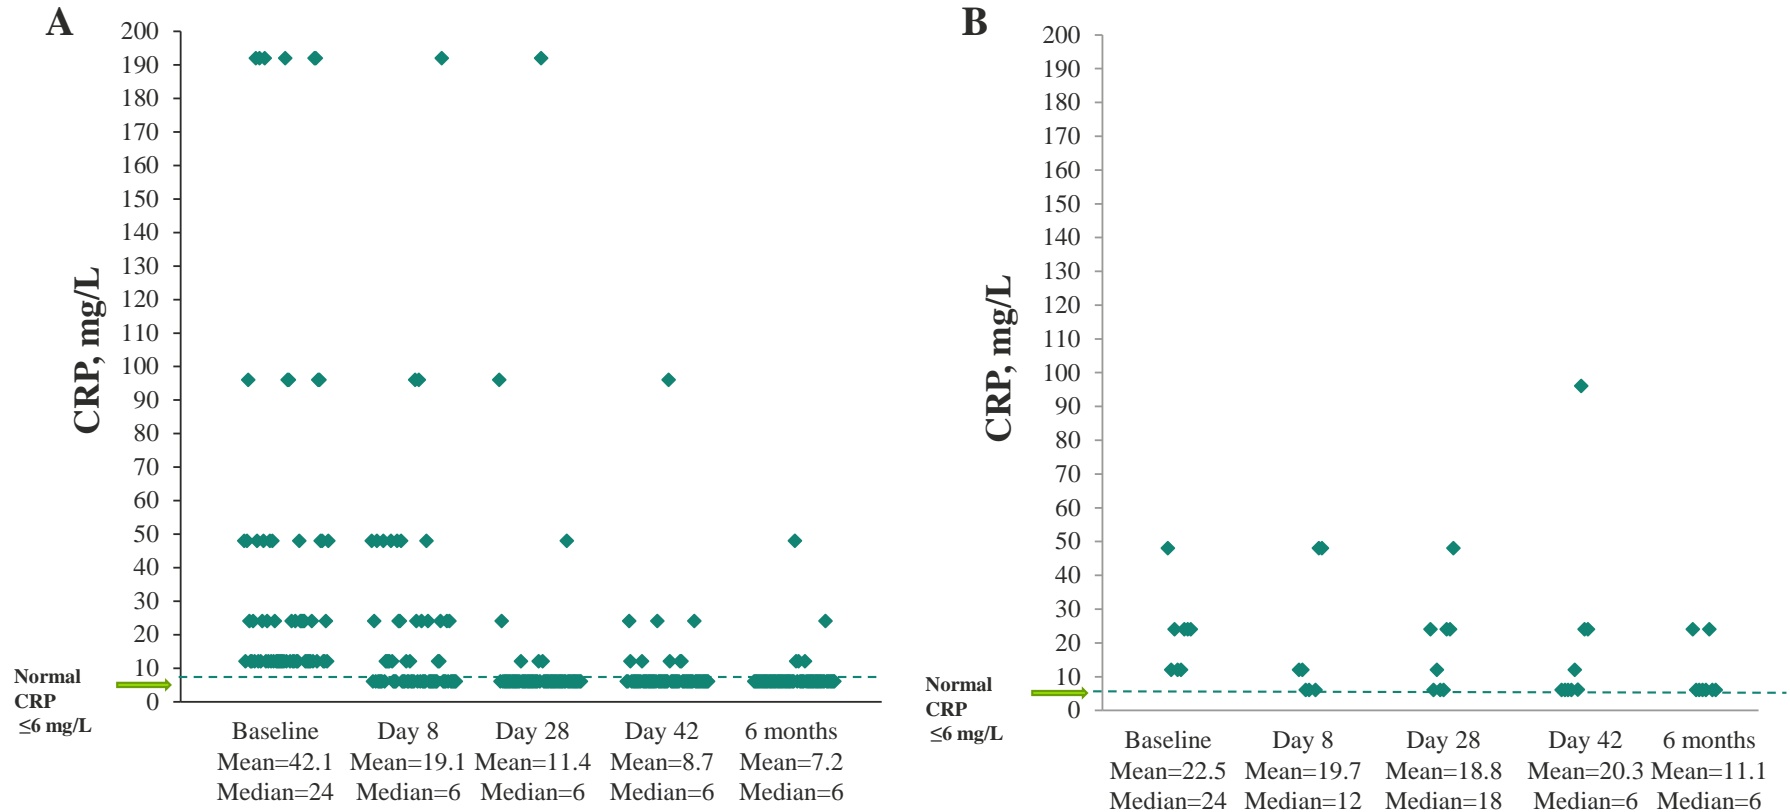

Supplement: ofy331_suppl_supplementary_material.pdf [file ofy331_suppl_supplementary_material.pdf]
